1 **Primate hippocampus size and organization are predicted by sociality but not diet**

2

3

4

5 Orlin S. Todorov<sup>1</sup>, Vera Weisbecker<sup>1</sup>, Emmanuel Gilissen<sup>2</sup>, Karl Zilles<sup>3</sup>, and Alexandra A. de

6 Sousa<sup>4</sup>

7 <sup>1</sup>School of Biological Sciences, The University of Queensland, St. Lucia, QLD,

8 4072, Australia

9 <sup>2</sup>Department of African Zoology, Royal Museum for Central Africa, Leuvensesteenweg,

10 3080 Tervuren, Belgium and Laboratory of Histology and Neuropathology, Université Libre

11 de Bruxelles, Brussels, Belgium

12 <sup>3</sup>Research Centre Jülich, Institute of Neuroscience and Medicine (INM-1), Jülich,

13 Germany,

14 <sup>4</sup>Psychology, Culture and Environment, Bath Spa University, Bath, BA2 9BN, UK

15

16

17

18

19

20

21

22

23

24

25

26 hippocampus, social group, spatial cognition, primates

27

28

### Abstract

29

30 The hippocampus is well known for its roles in spatial navigation and memory, but it is  
31 organized into regions that have different connections and functional specializations. Notably,  
32 the region CA2 has a role in social and not spatial cognition, as is the case for the regions  
33 CA1 and CA3 that surround it. Here we investigated the evolution of the hippocampus in  
34 terms of its size and organization in relation to the evolution of social and ecological variables  
35 in primates, namely home range, diet and different measures of group size. We found that the  
36 volumes within the whole cornu ammonis coevolve with group size, while only the volume of  
37 CA1 and subiculum can also be predicted by home range. On the other hand, diet, expressed  
38 as a shift from folivory toward frugivory, was shown to not be related to hippocampal  
39 volume. Interestingly, CA2 was shown to exhibit phylogenetic signal only against certain  
40 measures of group size but not with ecological factors. We also found that sex differences in  
41 the hippocampus are related to body size sex dimorphism. This is in line with reports of sex  
42 differences in hippocampal volume in non-primates that are related to social structure and sex  
43 differences in behaviour. Our findings support the notion that in primates, the hippocampus is  
44 a mosaic structure evolving in line with social pressures, where certain subsections evolve in  
45 line with spatial ability too.

46

## 1. Introduction

47 The relationship between behaviour and brain size and proportions has been the topic of  
48 intensive research for decades, with works on mammals focusing mainly on the question of  
49 how the exceedingly large brains of primates, and particularly humans, could evolve.  
50 However, while there is an emerging consensus on the energetic constraints on the evolution  
51 of brain enlargement [1, 2], the search for behavioural correlates of relative brain size has a  
52 long history of producing a frustrating diversity of results [3]. In primates, there's a long-  
53 standing debate about the degree to which ecological challenges have been met either directly  
54 through selection for individuals traits that are adaptations to those ecological challenges, or  
55 indirectly through social solutions [4]. Models of primate social intelligence and brain size  
56 emphasize social skills, including managing social complexity, theory of mind, social  
57 learning, and culture [4, 5]. On the other hand, models of ecological intelligence demonstrate  
58 an important impact of home range size and/or diet [6-9] on relative brain size. Evidence  
59 about which of these (home range or diet) is the main determinant of brain size is ambiguous  
60 [6][7], but both possibly relate to the memory demands of locating and identifying  
61 unpredictable food sources or mates, or tool use and social behaviour [10-13].  
62 An important caveat to studies of "intelligence" and brain morphology is the fact that most  
63 analyses of brain morphology addressing social and ecological factors across primate  
64 evolution only consider how they relate to brain size (absolute or relative). However, there is  
65 increasing awareness that more specific aspects of brain organization may better relate to  
66 more specific cognitive abilities [14], consistent with long-standing evidence that the brain is  
67 a mosaic of different regions, which may respond differentially to selection for specific  
68 behaviours [15-18]  
69 The mammalian hippocampus is of particular interest in terms of dissecting the morphological  
70 correlates of ecological and social behaviour. It is well known for its roles in both spatial

71 cognition [19] and memory [20], and also has an important role in behavioural inhibition [21]  
72 in rodents and primates, including humans. The hippocampus' role in spatial cognition has  
73 been the topic of several comparative analyses related to “ecological intelligence”, and has  
74 benefitted from studies in rodents that have revealed a neurophysiological mechanism for  
75 mapping spatial coordinates in navigation [19]. The hippocampus contains a population of  
76 neurons (‘place cells’) that respond whenever an animal is in a specific location [22] and  
77 these produce a dynamic ‘cognitive map’ of the environment by firing in a concerted fashion  
78 [23]. Similarly, the entorhinal cortex, a structure neighbouring the hippocampus in the larger  
79 "hippocampal complex", has a population of “grid cells”, which fire when an animal enters an  
80 environment with geometrically patterned locations [24]. Another component of  
81 hippocampus-related “ecological intelligence” is its essential function in declarative or  
82 relational memory possibly through a spatial-based mechanism [25, 26]. The hippocampus  
83 also has a role in behavioural inhibition [21] and olfactory memory [27].  
84 While declarative memory is a very broadly relevant cognitive ability it is hard to relate to  
85 ecological variables. On the other hand, the hippocampus' role in spatial cognition is often  
86 related to the ecological variable home range, defined as "that part of an animal’s cognitive  
87 map of its environment that it chooses to keep updated” [28]. Some studies have suggested a  
88 direct link between species’ home range size and species’ hippocampal size . In desert  
89 rodents, the bannertail kangaroo rat has relatively low spatial memory requirements and has a  
90 small hippocampus, whereas Merriam's kangaroo rat uses spatial memory to relocate its  
91 caches in scattered locations, and larger hippocampus [29]. The "avian hippocampus” in the  
92 medial pallial zone is homologous to that in mammals and also functions in spatial memory  
93 [30]. This is consistent with the fact that food-storing birds have relatively larger hippocampi  
94 [31, 32].

95 The size and internal organization of the hippocampus is also subject to within-species  
96 variation and individual plasticity. Volumetric reorganization of the hippocampus has been  
97 related to the occupational specialization in humans [33]. In birds, hippocampal size and  
98 structure is plastic, being affected by experience [34], and seasonality [35]. In arboreal  
99 primates, a relationship was found between hippocampus size and home range size [36], but  
100 overall, this relationship remains unclear [36] [37]. The possibility for a predictive function of  
101 the hippocampus is particularly evident from studies of sexual dimorphism in hippocampal  
102 size and spatial ability. Whereas male and female meadow voles are sexually dimorphic in  
103 their performance on spatial tasks, hippocampus volume, and home range size, pine voles are  
104 not [38]. Further, in two other polygamous rodent species the relative size of the hippocampus  
105 is greater in males than in females [29], while males and females of the monogamous desert  
106 kangaroo rat do not differ in home range nor in spatial ability [39]. Similarly, during breeding  
107 season, deer mice are polygynous and males have larger home ranges, and outperform  
108 females on spatial tasks [40]. Sex differences in spatial ability and home range size are also  
109 related in two species of carnivores - males exhibit larger home ranges and superior spatial  
110 ability compared to females in the promiscuous giant pandas, but not in the monogamous  
111 Asian small clawed otter [41]. Consistent with the hypothesis that function drives anatomy,  
112 the sex differences are reversed in wider ranging females. In a brood parasite bird species, the  
113 brown-headed cowbirds, females which travel further than males have larger hippocampi [42]  
114 and exhibit superior spatial memory [43].

115 As of recently, some light has been shed on the role of the hippocampus in social behaviour  
116 and cognition. Hippocampal place cells are involved in processing the presence of  
117 conspecifics in bats [44] and hippocampal volume has been related to social phobia as part of  
118 adjacent circuits in humans [45]. Although the representation system of the hippocampal  
119 complex is itself spatial, this coordinate system is capable of processing other spatially

120 representable information – such is the case of its role as a "memory map" for encoding  
121 declarative memories [25], or social information [46]. In rats, support for the mechanism  
122 comes from studies finding the hippocampus (specifically a substructure described below,  
123 CA2) uses place fields to encode information about conspecifics [47]. Given these novel  
124 insights into hippocampus function, in species where social behaviour plays an important role,  
125 the involvement of the hippocampus in social information processing might be greater. This  
126 also has implications for linking social and spatial cognition more generally, as they can be  
127 represented in the same cognitive systems [48].

128

### 129 **Hippocampal regions**

130 All fields of the hippocampus formation (retrohippocampus, RH) receive inputs from the  
131 entorhinal cortex (EC) along the perforant pathway [49]. Part of it, hippocampus proper,  
132 refers to the cornu ammonis (CA) and the fascia dentata (FD); more commonly these same  
133 regions are divided up into CA1-3 and the dentate gyrus (DG) (Table 1). DG has traditionally  
134 been considered the gateway of the hippocampus because it blocks or filters excitatory  
135 afferents from the EC [50]. Sensory and associative projections from the EC synapse in the  
136 DG [51]. DG arranges sensory inputs to create a metric spatial representation and is involved  
137 in episodic memory and spontaneous exploration of novel environments [52]. DG can be  
138 further subdivided into the fascia dentata (FD) and the hilus (part of the CA). Adjacent to the  
139 FD, the CA is comprised of four fields arranged in a loop, beginning with the hilus (i.e., CA4)  
140 [53]. The hilus is situated along the mossy fiber pathway from the granular stratum of FD to  
141 CA3 and is involved in spatial learning and memory retrieval [54]. It has a role in sequence  
142 learning [55], and local lesions affect pattern separation, particularly for highly similar inputs  
143 [56]. Next are the sequential CA regions in descending order - CA3, CA2, CA1. CA3 receives  
144 connections from the mossy fibers of FD, which it projects to CA1 and back, bypassing CA2.

145 There are associational bilateral (ipsilateral and contralateral) connections to CA3 [57]. CA3  
146 can be further divided into subregions: CA3a and CA3b encode spatial information into short-  
147 term memory, while CA3c processes environmental geometry along with DG [58]. CA1  
148 receives projections from CA3 and is involved in spatial memory [59]. The spatial properties  
149 of CA1 and CA3 are due to these regions being the primary locations of ‘place cells’,  
150 responding differentially according to the spatial location of the animal [60]. Adjacent to  
151 CA3, the subiculum has inputs from EC and bilateral connections with perirhinal cortex and  
152 CA1 [61]. It is a major output of the hippocampus with pronounced dorso-ventral segregation  
153 of function: the dorsal component is involved in processing of spatial information and  
154 information related to movement and memory, while the ventral is a type of interface between  
155 the hippocampus and the hypothalamic–pituitary–adrenal axis, a feedback system that  
156 regulates homeostasis and stress [61]. The subiculum receives projections mostly from CA1  
157 and these are organized in a simple pattern - all sections of CA1 project to the subiculum and  
158 all parts of the subiculum receive input from CA1 [62]. Moreover, subicular neurons exhibit  
159 spatially-selective firing [61] with a robust location signal [63].

160

161 <<Figure 1 about here>>

162

163 CA2 has been suggested to act as an interface between emotion and cognition [64]. CA2  
164 receives strong inhibitory inputs from EC, CA3, and DG, and has outputs to CA1 [65]. It is  
165 also influenced by many neuromodulators, receiving unique input from hypothalamic nuclei  
166 associated with social context, reward, and novelty [64] – supramammillary, paraventricular,  
167 median raphe, septal, and the vertical and horizontal limbs of the nucleus of diagonal band of  
168 Broca [65]. CA2 has outputs to septum and the supramammillary nucleus. Unlike CA1 and  
169 CA3, lesions to CA2 do not affect spatial memory in Morris water maze test, nor impact

170 locomotor ability, anxiety or fear memory in rodents [66]. Rather, CA2 is involved in social  
171 memory and recognition of conspecifics [66]. There are some indications its size may be  
172 particularly adaptive to social and emotional experiences - decrease in CA2 neuron numbers  
173 is associated with schizophrenia and bipolar disorder [67] and stress-related increases in the  
174 density of brain-derived neurotrophic factor neurons are greater in CA2 than CA3 [68].

175

176 Here we investigate the evolution of hippocampal size and organization in primates, in  
177 relation to social and ecological pressures. Given the importance of the hippocampus in  
178 spatial cognition, and the subiculum, CA1, CA3, and FD in particular, we predict that these  
179 will be related to variation in ecological variables: home range size and/or dietary complexity.  
180 Additionally, we predict CA2 volume to be related to social memory, measured through  
181 group size. We also expect that amongst brain areas, dimorphism in hippocampal size will be  
182 the best predictor of dimorphism in body size.

183

184

## 2. Methods

185

### 186 (a) Anatomical data

187 The morphometric structure of the hippocampus was determined from previously published  
188 volumetric data [69]. For measurements, the retrohippocampus (RH) has been divided into:  
189 dentate gyrus (reported in [69] as *fascia dentata*, FD), *hilus* (HIL), CA3, CA2, CA1, and  
190 *subiculum* (SUB). Volume measurements include the white matter comprising the rest of the  
191 hippocampus [69, 70] measured together as *HP+HS+fibers*, that is the hippocampus  
192 praecommissuralis (HP) plus the hippocampus supracommissuralis (HS) plus the fibers of the  
193 fimbria/fornix complex. Volumes for whole *brain* were taken from the same source [69].



194 Volumes for *neocortex* (white and grey matter; NEO) were obtained from the same research  
195 group [70].  
196 Unpublished data on brain component volumes of males and females were used to determine  
197 averages for each sex in a subsample of primates, and correspond to anatomical definitions in  
198 [70]. The brain components include 7 telencephalic components: *bulbus olfactorius* + *bulbus*  
199 *olfactorius accessorius* (bulbus olfactorius accessorius is absent in higher primates; BOL),  
200 *lobus piriformis* (palaeocortex and amygdala; PAL), *septum* (septum pellucidum, septum  
201 verum, Broca's diagonal band, bed nuclei of the anterior commissure and stria terminalis;  
202 SEP), *striatum* (caudate nucleus, putamen, nucleus accumbens, and the parts of the capsula  
203 interna running through the striatum; STR), *schizocortex* (ento- and perirhinal, pre- and  
204 parasubicular cortices and the underlying white matter; SCH), *hippocampus* (including all  
205 regions; HIP), *neocortex* (white and grey matter; NEO). Included were *diencephalon* (plus  
206 globus pallidus without hypophysis; DIE), *mesencephalon* (without substantia reticularis;  
207 MES), *cerebellum* (brachium and nuclei pontis, CER), and *medulla oblongata* (plus  
208 substantia reticularis; MED). Body weight (BoW) data was available for the same individuals,  
209 except for *Miopithecus talapoin* female body weight, which was taken from [71]. Sexual size  
210 dimorphism was determined from BoW and calculated as the ratio of male BoW divided by  
211 female BoW. Sexual dimorphism in each of the brain structures was calculated as the ratio of  
212 the volume in males vs females.

213

#### 214 **(b) Social and ecological data**

215 Data were collated from three different sources. Home range area in hectares “HR size  
216 average” (HR) were from Powell et al. [7], frugivory “% fruit” were from DeCasien et al. [6],  
217 “group size combined” were from [7]. Further, “social group size” data are from [6] and  
218 “mean group size” and “mean number of females per group” are from Dunbar et al. [72].

219 These different studies use different methods for collating the datasets, where it is not always  
220 clear whether group size indicates social or foraging group, or whether diet information has  
221 been calculated uniformly and reliably.

222

### 223 **(c) Phylogeny**

224 The consensus phylogenetic tree of 43 species of apes and monkeys was obtained from 10k  
225 Trees [73] and information about phylogenetic non-independence was incorporated in all  
226 analysis. Changes in taxonomic nomenclature were considered for matching species names  
227 from the brain dataset to the tree.

228

### 229 **(d) Statistical analysis**

230 All continuous variables were natural log transformed, except for % fruit. Bonferroni  
231 correction was applied on the  $\alpha$  level (“significance cut-off” of 0.05) on models tested  
232 multiple times by dividing it by the number of comparisons with the same dependent variable  
233 (4 models with different group size measures resulting in corrected  $\alpha$  of 0.0125).

234 Analyses were run on R version 3.6.1 [74] using the packages phytools [75] and caper [76].

235 Using the fastanc function in phytools we estimated the ancestral states and painted them on  
236 the tree using Fancytree. We used caper for all PGLS analyses. Phylogenetic signal (Pagel's  $\lambda$ )  
237 was estimated using Maximum Likelihood and kappa ( $k$ ) and delta ( $\delta$ ) were fixed to 1. We  
238 tested four ‘full’ models including home range size, fraction fruit and each of four different  
239 measures of group size against hippocampus and hippocampal region volumes.

240 Additionally, we explored the relationship between neocortex and brain volume with  
241 hippocampus volume. Means square statistics were obtained via sequential sum of squares  
242 ANOVA.

243 The volume of the region of interest was always used as the dependent variable in our models,  
244 and brain volume was included as a covariate. All variables were shown to be normally  
245 distributed, and variance inflation factors of each models were shown to be <3.5 meaning that  
246 there was no problem with collinearity. Interactions between predictors were not included as  
247 to avoid high cross-collinearity.

248 We also tested additional single variable models including either only home range, diet or  
249 group sizes against hippocampal regional volumes, also correcting for total brain volume.

250 This was done because the ‘full’ model resulted in sample sizes between 20 and 30, while  
251 running the separate models mostly utilised the full dataset of 43 species. For results of these  
252 models see the Supplementary material.

253 Additionally, all four ‘full’ models were evaluated and ranked using AIC (Akaike Information  
254 Criterion). [77].

255

256 All data (including anatomical, social and ecological variables), code, phylogenetic trees and  
257 analysis outputs are included in the supplementary material.

258

259

260

### 3. Results

261

#### 262 (a) Ancestral state estimation

263 An exploratory ancestral state estimation revealed that in species where relative hippocampal  
264 volume has decreased (calculated as the residuals from the phylogenetic regression with total  
265 brain volume) have nonetheless undergone an increase in absolute hippocampus volume (Fig.  
266 2). We further tested this observation using PGLS and found that hippocampus volume  
267 increased with a shallower slope compared to both brain and neocortex volumes i.e. species

268 that evolve towards greater neocorticalization have smaller relative hippocampi. (See  
269 Neocortex section). An exception is the pygmy marmoset (*Callithrix pygmaea*), for which  
270 both absolute and relative volume have decreased. This finding is unsurprising due to the  
271 expected effects of dwarfism in this species and the limitation this exerts on brain size [78]. In  
272 the case of the lar gibbon (*Hylobates lar*) the analysis revealed an increase in both volumes  
273 from the ancestral state, possibly reflecting the complexity of its habitats and the subsequent  
274 expansion of both hippocampus volume and brain volume.

275

276 <<Figure 2 about here>>

277

## 278 (b) PGLS

279 Testing the ‘full’ models with all four different group size measures separately yielded  
280 comparable results. Shown in Table 2 are the results with the groups size measure resulting in  
281 the largest sample size – group size from Dunbar [72]. Hippocampus and all regional volumes  
282 besides subiculum and hilus could be predicted by group size, home range was shown to be a  
283 significant predictor of subiculum and CA1, while fraction fruit was not significantly related  
284 to any of the hippocampal structures. The results of the other three models are included in the  
285 supplementary material.

286

287 Additionally, each of the four models using different group size measures were compared  
288 using AIC (Table 3) and while female group size (from Dunbar [72]) was shown to produce  
289 best fitting models in most cases, the sample size was the lowest (N=20) eliminating more  
290 than half of the species included in the dataset. In order to utilise our full dataset of 43  
291 species, we also ran separate models including only 1 class of predictors (ecological, social or

292 dietary). The results were concordant with the ‘full’ models and are included in the  
293 supplementary material.

294

295 <<Tables 2 and 3 about here>>

296 <<Figure 3 here>>

297

#### 298 **(d) Neocortex**

299 Following up on the observation that 1) both hippocampus and all its subcomponents were  
300 positively related to brain volume, 2) many interactions between predictors and brain volume  
301 were yielding negative slopes and 3) with increase in absolute hippocampal volume in some  
302 species there was nonetheless a decrease in the relative hippocampal volume, we investigated  
303 whether that relationship is driven by variation in neocortex volume as it comprises  
304 significant proportion of the total brain volume. We found that hippocampal volume is  
305 strongly negatively related to neocortex volume ( $\lambda = 0$ , slope = -3.81,  $t = -8.11$ ,  $p < 0.0001$ , 3,  
306 40 df) even after accounting for brain volume (see Supplementary results).

307

#### 308 **(e) Sexual size dimorphism**

309 We further explored the relationship between somatic and brain structure sexual dimorphism  
310 in a separate dataset of 12 primate species. Somatic sexual dimorphism was best predicted by  
311 hippocampus volume dimorphism, ( $\lambda = 0$ , slope = 1.87, Std. error = 0.35,  $t = 5.19$ ,  $p = 0.0004$   
312 on 1 and 10 df). Even though dimorphism in mesencephalon ( $\lambda = 0$ , slope = 1.35, Std. error =  
313 0.45,  $t = 2.96$ ,  $p = 0.014$  on 1 and 10 df) and lobus piriformis ( $\lambda = 0.78$ , slope = 0.67, Std. error =  
314 = 0.23,  $t = 2.83$ ,  $p = 0.018$  on 1 and 10 df) were also significant predictors of somatic sexual  
315 dimorphism, these relationships didn't stand after correction for multiple comparisons. The  
316 new level of  $\alpha$  for this batch of analysis was fixed to 0.0045 (dividing 0.05 by 11 structures)

317 and was sufficed by hippocampus volume alone. None of the other structure volumes (OBL,  
318 CER, DIE, BOL, SCH, SEP, STR, NEO) showed a relationship with somatic sexual  
319 dimorphism.

320

321

### 3. Discussion

322 We find that in primates, hippocampal volume and most of its subcomponents can be reliably  
323 predicted by different measures of group size and home range to a certain extent, but not diet.  
324 Moreover, we suggest that as brains get larger, the neocortex may take on functions shared  
325 with the hippocampus and thus hippocampus size relative to the rest of the brain gets smaller.  
326 Alternatively, the size of the hippocampus might be under strong developmental constraint.  
327 Hippocampal structures crucial to spatial memory, CA1 and subiculum, evolve in line with  
328 ecological (spatial) and social demands. CA2, CA3 and fascia dentata were shown to evolve  
329 in line only with social demands, unlike the hilus, for which volume could not be predicted by  
330 any of our models. No relationship between hippocampal volume and any of its  
331 subcomponents was detected with increased fruit consumption in the primate's diet.

332 First, neocorticalization outpaces the enlargement of the hippocampus, as indicated in the  
333 ancestral state estimation and the subsequent follow-up analysis. This is likely due to a  
334 reallocation of functions such as memory, spatial cognition, and inhibition from the  
335 hippocampus to the neocortex. With neocorticalization, parallel systems are thought to have  
336 emerged, leading to an increased neocortex ratio [79] and allocation of functions to the  
337 neocortex [80]. Whereas in smaller brained species the hippocampus is of utmost importance  
338 in many cognitive abilities, as the neocortex expands there may be a greater proportion of  
339 these functions allocated to it, or the neocortex might be taking up on an array of new social  
340 functions that do not exist in smaller brained species. The neocortex, like the hippocampus,  
341 provides mappings used in information acquisition, retention and use. Compared to rodents,

342 in highly neocorticalized humans, the hippocampus may not have as prominent a role in  
343 spatial cognition (especially when compare to its well-known role in human memory) [81].  
344 On the flip side, in primates, the neocortex may also have an increased role in spatial  
345 processing. Parietal association areas of the neocortex are also crucial to spatial perception  
346 and may provide navigational information and are the focus of spatial cognition studies [82].  
347 The interplay between the parietal and hippocampal neural networks remains poorly  
348 understood [83] although it has been suggested that both are involved in spatial navigation.  
349 Parietal representations provide an egocentric frame of reference and may map movements  
350 along a route according to route-centred positional information [84].  
351 Second, of the hippocampal regions, both CA1 and CA3 residuals show phylogenetic signal  
352 and coevolve with home range (CA1) and group size (CA1 and CA3) when we test single  
353 variable models (see Supplement for data on phylogenetic signal within each separate model).  
354 This is consistent with the notion that the hippocampus is involved in both social and  
355 ecological behaviour [44, 47]. Compared to other brain component volumes, hippocampus  
356 volume was found to be the best predictor for cognitive tasks measuring executive function in  
357 primates [85]. This is the first study linking these specific hippocampal substructures to both  
358 social and ecological factors across primates. This is in line with work in other taxa linking  
359 species-specific requirements for spatial memory and hippocampus volume [29], but the  
360 implication - which would benefit from future study - is that in primates the role of the  
361 hippocampus may be even more influenced by social factors.  
362 We found no relationship between the percentage fruit in diet and the size of the hippocampus  
363 or any of its subcomponents. While fruit acquisition may play an important role in  
364 intelligence [10, 86] and brain size [6], our findings suggest that the primary contribution of  
365 diet to these features may be the generalized support of the brain's high metabolic costs [9]  
366 rather than specifically influencing neural systems specialized for spatial ability. On the other

367 hand, non-dietary social-spatial memory factors, such as the ability to code for the locations  
368 of conspecifics, may be linked to hippocampus size.

369 Third, CA2 volume residuals showed no phylogenetic signal, except for in a regression with  
370 social and female group sizes in the single variable analysis (see Supplement for data on  
371 phylogenetic signal within each separate model). Thus, CA2 seems not to be under  
372 phylogenetic constraint related to home range or diet but is only shaped by social pressures.

373 This finding can be interpreted as an indicator of the relative functional decoupling of this  
374 zone to the rest of the hippocampus. CA2 may show species-specific adaptations related to  
375 behavioural niche which deviate from trends within a clade. Recent work on the function of  
376 CA2 in mice found that it has a special role in social memory [66] and it has a different gene  
377 expression profile from CA1 and CA3 [47]. On the other hand, the adaptability of CA2 might  
378 come at a cost in terms of maintaining elementary functions shared across species - unlike  
379 CA1 and CA3 it is a smaller region and is not involved in spatial tasks [66]. Additionally,  
380 hilus was one of the structures that showed no relationship to social group size. It is important  
381 in spatial and memory functions and may be less adaptable to changes in social structure.

382 We further investigated how hippocampus size is related to sexual dimorphism in primates  
383 since sex differences in hippocampal anatomy, spatial cognition, and home range size seem to  
384 be linked in some taxa [87]. We found that, of all brain structures examined, sexual  
385 dimorphism in the hippocampus is most closely related to somatic sexual dimorphism. It  
386 should be considered that spatial functions, like other brain functions, have become more  
387 corticalized in taxonomic groups with larger palliums such as primates [80]. However, the  
388 nature of the link is debated, for example, male superiority in spatial cognition may be a by-  
389 product of sex hormones rather than driven by ecological demands [88]. This provides a  
390 preliminary attempt to understand sex differences in the primate hippocampus.



391 Overall, we show that group size can predict the size of most hippocampus regions, while diet  
392 seems to be unrelated to hippocampal size at all. Moreover, group size was the only predictor  
393 that was related to total hippocampal size. Social group size is thought to be related to an  
394 increase in neocortex size, but this is mainly because of its role in higher cognitive social  
395 processes that are more demanding than simply remembering other individuals [89] [79].  
396 Social memories seem to be structured within the spatial framework of the hippocampus too  
397 [25]. In fact, social memory might in part be an exaptation that "reuses" neural circuitry of the  
398 hippocampus for spatial maps in an ancestral mammal [90, 91]. In line with this, the role of  
399 hippocampus in spatial cognition is pronounced in rodents, but less well understood in  
400 primates; in humans, it is argued that the hippocampus appears to function in memory rather  
401 than spatial cognition [81]. Given the importance of social skills in primates, it is possible that  
402 in this order, social memory (overlain onto spatial maps originally for navigation) has  
403 increased in dominance over spatial mapping. The importance of the increasing evidence that  
404 social and spatial cognition rely on the same underlying representations in humans, such that  
405 spatial maps provide a means for mapping social relations, is developing into applications  
406 ranging from design considerations in the built environment to clinical implications [48].  
407  
408  
409 We thank Anna van Oosterzee for stimulating discussions, Heiko Frahm for providing data  
410 and Simone Blomberg for statistical advice.

## 411 **References**

- 412 1. van Woerden J.T., Willems E.P., van Schaik C.P., Isler K. 2012 Large brains buffer  
413 energetic effects of seasonal habitats in catarrhine primates. *Evolution* **66**, 191-199.  
414 (doi:10.1111/j.1558-5646.2011.01434.x).
- 415 2. Weisbecker V., Blomberg S.P., Goldizen A.W., Brown M., Fisher D.O. 2015 The  
416 evolution of relative brain size in marsupials is energetically constrained but not driven  
417 by behavioural complexity. *Brain, behavior and evolution*. (doi:10.1159/000377666).
- 418 3. Healy S.D., Rowe C. 2007 A critique of comparative studies of brain size.  
419 *Proceedings of the Royal Society, London Series B* **274**, 453-464.  
420 (doi:10.1098/rspb.2006.3748).
- 421 4. Dunbar R.I.M., Shultz S. 2017 Why are there so many explanations for primate  
422 brain evolution? *Philos Trans R Soc Lond B Biol Sci* **372**(1727).  
423 (doi:10.1098/rstb.2016.0244).
- 424 5. Whiten A., van de Waal E. 2017 Social learning, culture and the 'socio-cultural  
425 brain' of human and non-human primates. *Neurosci Biobehav Rev* **82**, 58-75.  
426 (doi:10.1016/j.neubiorev.2016.12.018).
- 427 6. DeCasien A.R., Williams S.A., Higham J.P. 2017 Primate brain size is predicted by  
428 diet but not sociality. *Nat Ecol Evol* **1**(5), 112. (doi:10.1038/s41559-017-0112).
- 429 7. Powell L.E., Isler K., Barton R.A. 2017 Re-evaluating the link between brain size  
430 and behavioural ecology in primates. *Proc Biol Sci* **284**(1865).  
431 (doi:10.1098/rspb.2017.1765).
- 432 8. Herculano-Houzel S. 2011 Scaling of brain metabolism with a fixed energy budget  
433 per neuron: implications for neuronal activity, plasticity and evolution. *PLoS One* **6**(3),  
434 e17514. (doi:10.1371/journal.pone.0017514).
- 435 9. Fonseca-Azevedo K., Herculano-Houzel S. 2012 Metabolic constraint imposes  
436 tradeoff between body size and number of brain neurons in human evolution. *Proc Natl*  
437 *Acad Sci U S A* **109**(45), 18571-18576. (doi:10.1073/pnas.1206390109).
- 438 10. Milton K. 1981 Distribution Patterns of Tropical Plant Foods as an Evolutionary  
439 Stimulus to Primate Mental Development. *Am Anthropol* **83**(3), 534-548.  
440 (doi:10.1525/Aa.1981.83.3.02a00020  
441 10.2307/676751).
- 442 11. Milton K. 1988 Foraging behaviour and the evolution of primate intelligence. In  
443 *Machiavellian intelligence: Social expertise and the evolution of intellect in monkeys, apes,*  
444 *and humans* (eds. Byrne R.W., Whiten A.), pp. 285-305. Oxford, Clarendon Press.
- 445 12. Clutton-Brock T.H., Harvey P.H. 1980 Primates, Brains and Ecology. *Journal of*  
446 *Zoology* **190**(MAR), 309-323.
- 447 13. Mace G.M., Harvey P.H., Cluttonbrock T.H. 1981 Brain size and ecology in small  
448 mammals. *Journal of Zoology* **193**(Mar), 333-354. (doi:10.1111/j.1469-  
449 7998.1981.tb03449.x).
- 450 14. Weisbecker V., Goswami A. 2011 Neonatal maturity as the key to understanding  
451 brain size evolution in homeothermic vertebrates. *Bioessays* **33**(3), 155-158.  
452 (doi:10.1002/bies.201000128).
- 453 15. De Winter W., Oxnard C.E. 2001 Evolutionary radiations and convergences in the  
454 structural organization of mammalian brains. *Nature* **409**(6821), 710-714.
- 455 16. Gomez-Robles A., Hopkins W.D., Sherwood C.C. 2014 Modular structure facilitates  
456 mosaic evolution of the brain in chimpanzees and humans. *Nature communications* **5**,  
457 4469. (doi:10.1038/ncomms5469).

- 458 17. Barton R.A., Harvey P.H. 2000 Mosaic evolution of brain structure in mammals.  
459 *Nature* **405**(6790), 1055-1058. (doi:10.1038/35016580).
- 460 18. Carlisle A., Selwood L., Hinds L.A., Saunders N., Habgood M., Mardon K.,  
461 Weisbecker V. 2017 Testing hypotheses of developmental constraints on mammalian  
462 brain partition evolution, using marsupials. *Sci Rep* **7**(1), 4241. (doi:10.1038/s41598-  
463 017-02726-9).
- 464 19. Hartley T., Lever C., Burgess N., O'Keefe J. 2013 Space in the brain: how the  
465 hippocampal formation supports spatial cognition. *Philosophical transactions of the  
466 Royal Society of London Series B, Biological sciences* **369**(1635), 20120510-20120510.  
467 (doi:10.1098/rstb.2012.0510).
- 468 20. Squire L.R. 1992 Memory and the hippocampus: a synthesis from findings with  
469 rats, monkeys, and humans. *Psychol Rev* **99**(2), 195-231.
- 470 21. Taylor A.M., Bus T., Sprengel R., Seeburg P.H., Rawlins J.N., Bannerman D.M. 2014  
471 Hippocampal NMDA receptors are important for behavioural inhibition but not for  
472 encoding associative spatial memories. *Philos Trans R Soc Lond B Biol Sci* **369**(1633),  
473 20130149. (doi:10.1098/rstb.2013.0149).
- 474 22. O'Keefe J. 1976 Place units in the hippocampus of the freely moving rat. *Exp  
475 Neurol* **51**(1), 78-109. (doi:10.1016/0014-4886(76)90055-8).
- 476 23. O'Keefe J., Dostrovsky J. 1971 The hippocampus as a spatial map. Preliminary  
477 evidence from unit activity in the freely-moving rat. *Brain Res* **34**(1), 171-175.  
478 (doi:10.1016/0006-8993(71)90358-1).
- 479 24. Hafting T., Fyhn M., Molden S., Moser M.B., Moser E.I. 2005 Microstructure of a  
480 spatial map in the entorhinal cortex. *Nature* **436**(7052), 801-806.  
481 (doi:10.1038/nature03721).
- 482 25. Jeffery K.J. 2018 The Hippocampus: From Memory, to Map, to Memory Map.  
483 *Trends Neurosci* **41**(2), 64-66. (doi:10.1016/j.tins.2017.12.004).
- 484 26. Eichenbaum H. 2017 The role of the hippocampus in navigation is memory. *J  
485 Neurophysiol* **117**(4), 1785-1796. (doi:10.1152/jn.00005.2017).
- 486 27. Kaut K.P., Bunsey M.D., Riccio D.C. 2003 Olfactory learning and memory  
487 impairments following lesions to the hippocampus and perirhinal-entorhinal cortex.  
488 *Behav Neurosci* **117**(2), 304-319. (doi:10.1037/0735-7044.117.2.304).
- 489 28. Powell R.A., Mitchell M.S. 2012 What is a home range? *J Mammal* **93**(4), 948-958.  
490 (doi:10.1644/11-mamm-s-177.1).
- 491 29. Jacobs L.F., Spencer W.D. 1994 Natural space-use patterns and hippocampal size  
492 in kangaroo rats. *Brain Behav Evol* **44**(3), 125-132. (doi:10.1159/000113584).
- 493 30. Rodriguez F., Lopez J.C., Vargas J.P., Broglio C., Gomez Y., Salas C. 2002 Spatial  
494 memory and hippocampal pallium through vertebrate evolution: insights from reptiles  
495 and teleost fish. *Brain Res Bull* **57**(3-4), 499-503.
- 496 31. Garamszegi L.Z., Eens M. 2004 The evolution of hippocampus volume and brain  
497 size in relation to food hoarding in birds. *Ecology letters* **7**(12), 1216-1224.  
498 (doi:10.1111/j.1461-0248.2004.00685.x).
- 499 32. Lucas J.R., Brodin A., de Kort S.R., Clayton N.S. 2004 Does hippocampal size  
500 correlate with the degree of caching specialization? *Proc Biol Sci* **271**(1556), 2423-2429.  
501 (doi:10.1098/rspb.2004.2912).
- 502 33. Maguire E.A., Gadian D.G., Johnsrude I.S., Good C.D., Ashburner J., Frackowiak R.S.,  
503 Frith C.D. 2000 Navigation-related structural change in the hippocampi of taxi drivers.  
504 *Proc Natl Acad Sci U S A* **97**(8), 4398-4403. (doi:10.1073/pnas.070039597  
505 070039597 [pii]).

- 506 34. Clayton N.S., Krebs J.R. 1994 Hippocampal growth and attrition in birds affected  
507 by experience. *Proc Natl Acad Sci U S A* **91**(16), 7410-7414.
- 508 35. Smulders T.V., Shiflett M.W., Sperling A.J., DeVoogd T.J. 2000 Seasonal changes in  
509 neuron numbers in the hippocampal formation of a food-hoarding bird: the black-  
510 capped chickadee. *J Neurobiol* **44**(4), 414-422.
- 511 36. Barton R.A., Purvis A. 1994 Primate brains and ecology: looking beneath the  
512 surface. In *Current Primatology* (eds. Thierry B., Roeder A., Herrenschild J.), pp. 1-9.  
513 Strasbourg, Université Louis Pasteur.
- 514 37. Edler M. 2007 A comparative analysis of hippocampus size and ecological factors  
515 in primates, Kent State University.
- 516 38. Jacobs L.F., Gaulin S.J., Sherry D.F., Hoffman G.E. 1990 Evolution of spatial  
517 cognition: sex-specific patterns of spatial behavior predict hippocampal size. *Proc Natl*  
518 *Acad Sci U S A* **87**(16), 6349-6352. (doi:10.1073/pnas.87.16.6349).
- 519 39. Langley C.M. 1994 Spatial memory in the desert kangaroo rat (*Dipodomys*  
520 *deserti*). *J Comp Psychol* **108**(1), 3-14.
- 521 40. Galea L.A., Kavaliers M., Ossenkopp K.P. 1996 Sexually dimorphic spatial learning  
522 in meadow voles *Microtus pennsylvanicus* and deer mice *Peromyscus maniculatus*. *J Exp*  
523 *Biol* **199**(Pt 1), 195-200.
- 524 41. Perdue B.M., Snyder R.J., Zhihe Z., Marr M.J., Maple T.L. 2011 Sex differences in  
525 spatial ability: a test of the range size hypothesis in the order Carnivora. *Biology Letters*  
526 **7**(3), 380-383. (doi:10.1098/rsbl.2010.1116).
- 527 42. Sherry D.F. 2006 Neuroecology. *Annu Rev Psychol* **57**(1), 167-197.  
528 (doi:10.1146/annurev.psych.56.091103.070324).
- 529 43. Guigueno M.F., Snow D.A., Macdougall-Shackleton S.A., Sherry D.F. 2014 Female  
530 cowbirds have more accurate spatial memory than males. *Biol Lett* **10**(2), 20140026.  
531 (doi:10.1098/rsbl.2014.0026).
- 532 44. Omer D.B., Maimon S.R., Las L., Ulanovsky N. 2018 Social place-cells in the bat  
533 hippocampus. *Science* **359**(6372), 218-224. (doi:10.1126/science.aao3474).
- 534 45. Irle E., Ruhleder M., Lange C., Seidler-Brandler U., Salzer S., Dechent P., Weniger  
535 G., Leibing E., Leichsenring F. 2010 Reduced amygdalar and hippocampal size in adults  
536 with generalized social phobia. *J Psychiatry Neurosci* **35**(2), 126-131.
- 537 46. Rubin R.D., Watson P.D., Duff M.C., Cohen N.J. 2014 The role of the hippocampus  
538 in flexible cognition and social behavior. *Front Hum Neurosci* **8**, 742.  
539 (doi:10.3389/fnhum.2014.00742).
- 540 47. Alexander G.M., Farris S., Pirone J.R., Zheng C., Colgin L.L., Dudek S.M. 2016 Social  
541 and novel contexts modify hippocampal CA2 representations of space. *Nature*  
542 *communications* **7**, 10300. (doi:10.1038/ncomms10300).
- 543 48. Proulx M.J., Todorov O.S., Taylor Aiken A., de Sousa A.A. 2016 Where am I? Who  
544 am I? The Relation Between Spatial Cognition, Social Cognition and Individual  
545 Differences in the Built Environment. *Front Psychol* **7**, 64.  
546 (doi:10.3389/fpsyg.2016.00064).
- 547 49. Witter M.P., Naber P.A., van Haeften T., Machielsen W.C.M., Rombouts S.A.R.B.,  
548 Barkhof F., Scheltens P., Lopes da Silva F.H. 2000 Cortico-hippocampal communication  
549 by way of parallel parahippocampal-subicular pathways. *Hippocampus* **10**(4), 398-410.  
550 (doi:10.1002/1098-1063(2000)10:4<398::Aid-hipo6>3.0.Co;2-k).
- 551 50. Hsu D. 2007 The dentate gyrus as a filter or gate: a look back and a look ahead.  
552 *Prog Brain Res* **163**, 601-613. (doi:10.1016/s0079-6123(07)63032-5).
- 553 51. de la Rosa-Prieto C., Ubeda-Banon I., Mohedano-Moriano A., Pro-Sistiaga P., Saiz-  
554 Sanchez D., Insausti R., Martinez-Marcos A. 2009 Subicular and CA1 hippocampal

- 555 projections to the accessory olfactory bulb. *Hippocampus* **19**(2), 124-129.  
556 (doi:10.1002/hipo.20495).
- 557 52. Kesner R.P., Lee I., Gilbert P. 2004 A behavioral assessment of hippocampal  
558 function based on a subregional analysis. *Rev Neurosci* **15**(5), 333-351.
- 559 53. Amaral D.G. 1978 A golgi study of cell types in the hilar region of the  
560 hippocampus in the rat. *The Journal of Comparative Neurology* **182**(5), 851-914.  
561 (doi:10.1002/cne.901820508).
- 562 54. Andrews-Zwilling Y., Gillespie A.K., Kravitz A.V., Nelson A.B., Devidze N., Lo I.,  
563 Yoon S.Y., Bien-Ly N., Ring K., Zwilling D., et al. 2012 Hilar GABAergic interneuron  
564 activity controls spatial learning and memory retrieval. *PLoS One* **7**(7), e40555.  
565 (doi:10.1371/journal.pone.0040555).
- 566 55. Lorincz A., Buzsaki G. 2000 Two-phase computational model training long-term  
567 memories in the entorhinal-hippocampal region. *Ann N Y Acad Sci* **911**, 83-111.
- 568 56. Myers C.E., Scharfman H.E. 2009 A role for hilar cells in pattern separation in the  
569 dentate gyrus: a computational approach. *Hippocampus* **19**(4), 321-337.  
570 (doi:10.1002/hipo.20516).
- 571 57. Witter M.P. 2007 Intrinsic and extrinsic wiring of CA3: indications for  
572 connective heterogeneity. *Learn Mem* **14**(11), 705-713. (doi:10.1101/lm.725207).
- 573 58. Kesner R.P. 2007 Behavioral functions of the CA3 subregion of the hippocampus.  
574 *Learn Mem* **14**(11), 771-781. (doi:10.1101/lm.688207).
- 575 59. Tsien J.Z., Huerta P.T., Tonegawa S. 1996 The essential role of hippocampal CA1  
576 NMDA receptor-dependent synaptic plasticity in spatial memory. *Cell* **87**(7), 1327-1338.  
577 (doi:10.1016/S0092-8674(00)81827-9).
- 578 60. Moser E.I., Moser M.B. 2009 Hippocampus and Neural Representations. In  
579 *Encyclopedia of Neuroscience* (pp. 1129-1136).
- 580 61. O'Mara S. 2005 The subiculum: what it does, what it might do, and what  
581 neuroanatomy has yet to tell us. *J Anat* **207**(3), 271-282. (doi:10.1111/j.1469-  
582 7580.2005.00446.x).
- 583 62. Amaral D.G., Dolorfo C., Alvarez-Royo P. 1991 Organization of CA1 projections to  
584 the subiculum: a PHA-L analysis in the rat. *Hippocampus* **1**(4), 415-435.  
585 (doi:10.1002/hipo.450010410).
- 586 63. Sharp P.E., Green C. 1994 Spatial correlates of firing patterns of single cells in the  
587 subiculum of the freely moving rat. *J Neurosci* **14**(4), 2339-2356.
- 588 64. Chevalyere V., Piskorowski R.A. 2016 Hippocampal Area CA2: An Overlooked but  
589 Promising Therapeutic Target. *Trends Mol Med* **22**(8), 645-655.  
590 (doi:10.1016/j.molmed.2016.06.007).
- 591 65. Cui Z., Gerfen C.R., Young W.S., 3rd. 2013 Hypothalamic and other connections  
592 with dorsal CA2 area of the mouse hippocampus. *J Comp Neurol* **521**(8), 1844-1866.  
593 (doi:10.1002/cne.23263).
- 594 66. Hitti F.L., Siegelbaum S.A. 2014 The hippocampal CA2 region is essential for  
595 social memory. *Nature*. (doi:10.1038/nature13028).
- 596 67. Benes F.M., Kwok E.W., Vincent S.L., Todtenkopf M.S. 1998 A reduction of  
597 nonpyramidal cells in sector CA2 of schizophrenics and manic depressives. *Biol*  
598 *Psychiatry* **44**(2), 88-97. (doi:10.1016/s0006-3223(98)00138-3).
- 599 68. Badowska-Szalewska E., Ludkiewicz B., Krawczyk R., Melka N., Morys J. 2017  
600 Comparison of the influence of two models of mild stress on hippocampal brain-derived  
601 neurotrophin factor (BDNF) immunoreactivity in old age rats. *Acta Neurobiol Exp (Wars)*  
602 **77**(1), 68-76. (doi:10.21307/ane-2017-037).

- 603 69. Frahm H.D., Zilles K. 1994 Volumetric comparison of hippocampal regions in 44  
604 primate species. *J Hirnforsch* **35**(3), 343-354.
- 605 70. Stephan H., Frahm H., Baron G. 1981 New and revised data on volumes of brain  
606 structures in insectivores and primates. *Folia Primatol (Basel)* **35**(1), 1-29.  
607 (doi:10.1159/000155963).
- 608 71. Gautier-Hion A., Gautier J.P. 1976 [Growth, sexual maturity, social maturity and  
609 reproduction in African Forest Cercopithecines (author's transl)]. *Folia Primatol (Basel)*  
610 **26**(3), 165-184. (doi:10.1159/000155749).
- 611 72. Dunbar R.I.M., Mac Carron P., Shultz S. 2018 Primate social group sizes exhibit a  
612 regular scaling pattern with natural attractors. *Biol Lett* **14**(1).  
613 (doi:10.1098/rsbl.2017.0490).
- 614 73. Arnold C., Matthews L.J., Nunn C.L. 2010 The 10ktrees website: A new online  
615 resource for primate phylogeny. *Evolutionary Anthropology: Issues, News, and Reviews*  
616 **19**(3), 114-118. (doi:10.1002/evan.20251).
- 617 74. R Core Team. 2018 R: A language and environment for statistical computing. . In  
618 *R Foundation for Statistical Computing* (Vienna, Austria).
- 619 75. Revell L.J. 2012 phytools: an R package for phylogenetic comparative biology  
620 (and other things). *Methods in Ecology and Evolution* **3**(2), 217-223.  
621 (doi:10.1111/j.2041-210X.2011.00169.x).
- 622 76. Orme D., Freckleton R.P., Thomas G.H., Petzoldt T., Fritz S.A., Isaac N. 2013 *CAPER:*  
623 *comparative analyses of phylogenetics and evolution in R* 145-151 p.
- 624 77. Burnham K., Anderson D. 2004 Model selection and multi-model inference.  
625 *Second NY: Springer-Verlag* **63**.
- 626 78. Montgomery S.H., Mundy N.I. 2013 Parallel episodes of phyletic dwarfism in  
627 callitrichid and cheirogaleid primates. *J Evol Biol*, n/a-n/a. (doi:10.1111/jeb.12097).
- 628 79. Dunbar R.I.M. 1992 Neocortex size as a constraint on group-size in primates. *J*  
629 *Hum Evol* **22**(6), 469-493. (doi:10.1016/0047-2484(92)90081-J).
- 630 80. Boraud T., Leblois A., Rougier N.P. 2018 A natural history of skills. *Prog Neurobiol.*  
631 (doi:10.1016/j.pneurobio.2018.08.003).
- 632 81. Kim S., Dede A.J., Hopkins R.O., Squire L.R. 2015 Memory, scene construction, and  
633 the human hippocampus. *Proc Natl Acad Sci U S A* **112**(15), 4767-4772.  
634 (doi:10.1073/pnas.1503863112).
- 635 82. Arbib M.A. 1997 From visual affordances in monkey parietal cortex to  
636 hippocampo-parietal interactions underlying rat navigation. *Philos Trans R Soc Lond B*  
637 *Biol Sci* **352**(1360), 1429-1436. (doi:10.1098/rstb.1997.0129).
- 638 83. Whitlock J.R., Sutherland R.J., Witter M.P., Moser M.B., Moser E.I. 2008 Navigating  
639 from hippocampus to parietal cortex. *Proc Natl Acad Sci U S A* **105**(39), 14755-14762.  
640 (doi:10.1073/pnas.0804216105).
- 641 84. Nitz D. 2009 Parietal cortex, navigation, and the construction of arbitrary  
642 reference frames for spatial information. *Neurobiol Learn Mem* **91**(2), 179-185.  
643 (doi:10.1016/j.nlm.2008.08.007).
- 644 85. Shultz S., Dunbar R.I.M. 2010 Species differences in executive function correlate  
645 with hippocampus volume and neocortex ratio across nonhuman primates. *J Comp Psych*  
646 **124**(3), 252-260. (doi:10.1037/a0018894).
- 647 86. Milton K., May M.L. 1976 Body weight, diet and home range area in primates.  
648 *Nature* **259**(5543), 459-462. (doi:10.1038/259459a0).
- 649 87. Jones C.M., Braithwaite V.A., Healy S.D. 2003 The evolution of sex differences in  
650 spatial ability. *Behav Neurosci* **117**(3), 403-411. (doi:10.1037/0735-7044.117.3.403).

- 651 88. Clint E.K., Sober E., Garland T., Jr., Rhodes J.S. 2012 Male superiority in spatial  
652 navigation: adaptation or side effect? *Q Rev Biol* **87**(4), 289-313. (doi:10.1086/668168).  
653 89. Lewis P.A., Birch A., Hall A., Dunbar R.I.M. 2017 Higher order intentionality tasks  
654 are cognitively more demanding. *Soc Cogn Affect Neurosci* **12** (7), 1063-1071.  
655 (doi:10.1093/scan/nsx034).  
656 90. Anderson M.L. 2010 Neural reuse: a fundamental organizational principle of the  
657 brain. *Behav Brain Sci* **33**(4), 245-266; discussion 266-313.  
658 (doi:10.1017/s0140525x10000853).  
659 91. Dehaene S., Cohen L. 2007 Cultural recycling of cortical maps. *Neuron* **56**(2), 384-  
660 398. (doi:10.1016/j.neuron.2007.10.004).  
661

662

663

## Appendices

664

665

666 **Table 1. Hippocampal regions investigated**

|                                                       |  |  |  |  |  |  |  |  |  |  |       |  |
|-------------------------------------------------------|--|--|--|--|--|--|--|--|--|--|-------|--|
| Hippocampus total (=Hippocampal formation; HIP)       |  |  |  |  |  |  |  |  |  |  |       |  |
| Retrocommissural hippocampus (= Retrohippocampus; HR) |  |  |  |  |  |  |  |  |  |  |       |  |
| Hippocampus proper                                    |  |  |  |  |  |  |  |  |  |  |       |  |
| Cornu ammonis                                         |  |  |  |  |  |  |  |  |  |  |       |  |
| CA1                                                   |  |  |  |  |  |  |  |  |  |  |       |  |
| CA2                                                   |  |  |  |  |  |  |  |  |  |  |       |  |
| CA3                                                   |  |  |  |  |  |  |  |  |  |  |       |  |
| CA4                                                   |  |  |  |  |  |  |  |  |  |  |       |  |
| "deep stratum multiforme of the dentate gyrus"        |  |  |  |  |  |  |  |  |  |  | "Hilu |  |
| Fascia dentata (FD)                                   |  |  |  |  |  |  |  |  |  |  |       |  |
| Prosubiculum                                          |  |  |  |  |  |  |  |  |  |  |       |  |
| Subiculum                                             |  |  |  |  |  |  |  |  |  |  |       |  |
| "HP+HS+fibers" or "fibers"                            |  |  |  |  |  |  |  |  |  |  | "Sub: |  |
| Hippocampus praecommissuralis (HP)                    |  |  |  |  |  |  |  |  |  |  |       |  |
| Hippocampus supracommissuralis (HS)                   |  |  |  |  |  |  |  |  |  |  |       |  |
| fimbria/fornix complex                                |  |  |  |  |  |  |  |  |  |  |       |  |

*Note.* The subicular complex includes pro-, pre-, parasubiculum and subiculum. The region called "subiculum (SUB)" in Frahm and Zilles (2007) and parasubiculum were not included in Frahm and Zilles (1994) as part of the hippocampus volumes and were not examined here. In Striedter (2004) with entorhinum and perirhinum as the Schizocortex.

**Table 2. ANOVA output from testing the full model (with Group size from Dunbar) versus hippocampal and regional volumes. On the left are shown means squares from the sequential SS ANOVA, p-values and lambda values of the phylogenetic signal of the residuals.**

|             | Hippocampus |         | HP+HS+ fibers |         | Retrohippocampus |         | Subiculum |         | Hilus   |         | CA1     |         |
|-------------|-------------|---------|---------------|---------|------------------|---------|-----------|---------|---------|---------|---------|---------|
|             | Mean sq     | p       | Mean sq       | p       | Mean sq          | p       | Mean sq   | p       | Mean sq | p       | Mean sq | p       |
| Total Brain | 0.397       | <0.001* | 0.568         | <0.001* | 0.354            | <0.001* | 0.342     | <0.001* | 0.441   | <0.001* | 0.367   | <0.001* |



|                     |       |         |       |        |       |         |       |        |       |      |       |        |
|---------------------|-------|---------|-------|--------|-------|---------|-------|--------|-------|------|-------|--------|
| Home Range          | 0.002 | 0.074   | 0     | 0.58   | 0.005 | 0.02    | 0.014 | 0.007* | 0.009 | 0.04 | 0.012 | 0.001  |
| Group Size (Dunbar) | 0.012 | <0.001* | 0.011 | 0.002* | 0.013 | <0.001* | 0.008 | 0.04   | 0.007 | 0.06 | 0.013 | <0.001 |
| Fraction Fruit      | 0.001 | 0.25    | 0     | 0.94   | 0.001 | 0.27    | 0     | 0.74   | 0.002 | 0.38 | 0     | 0.34   |
| Residuals           | 0     |         | 0.001 |        | 0     |         | 0.001 |        | 0.002 |      | 0     |        |
| $\lambda$           | 0.59  |         | 0.56  |        | 0.59  |         | 0.47  |        | 0.22  |      | 0.58  |        |

**Table 3. Model fit ranking of all four group size measures. Displayed are the AIC scores and all m are bolded.**

|                  | Group size (Powell) | Social group size (DeCasien) | Group size (Dunbar) | Female group (Dunbar) |
|------------------|---------------------|------------------------------|---------------------|-----------------------|
| Hippocampus      | -3.7                | <b>-6.8</b>                  | 9.0                 | <b>-6.7</b>           |
| HP+HS+ fibers    | 10.3                | 9.5                          | <b>4.2</b>          | <b>6.1</b>            |
| Retrohippocampus | 0.2                 | <b>-1.8</b>                  | <b>-2.2</b>         | <b>-2.5</b>           |
| Subiculum        | 25.5                | 23.1                         | 24.3                | <b>17.1</b>           |
| Hilus            | 33.9                | 34.9                         | 34.1                | <b>12.6</b>           |
| CA1              | 4.3                 | <b>2.5</b>                   | <b>1.5</b>          | 5.4                   |
| CA2              | 4.9                 | <b>2.1</b>                   | <b>1.4</b>          | <b>2</b>              |
| CA3              | -14                 | <b>-4.9</b>                  | -9.7                | -7                    |
| FD               | 7.7                 | 6.6                          | 6.9                 | <b>-4.2</b>           |

667

668

### Figures Captions

669

670 Figure 1. Hippocampus of *Miopithecus talapoin*. LV – Lateral ventricle, FD – Fascia dentata

671

672 Figure 2. Ancestral state estimations of absolute hippocampal volume (left), and the residuals

673 from the phylogenetic regression with total brain size (right). We observe that most species

674 that had increase in absolute hippocampal volume had a reciprocal decrease in hippocampal

675 volume relative to the whole brain.

676

677 Figure 3. Plot of regression of total brain volume (black solid line and black circles), fraction

678 fruit (red small-dashed line and red squares) and home range (blue long-dashed line and blue

679 triangles), and group size (green dotted line and green pluses) against hippocampal volume.

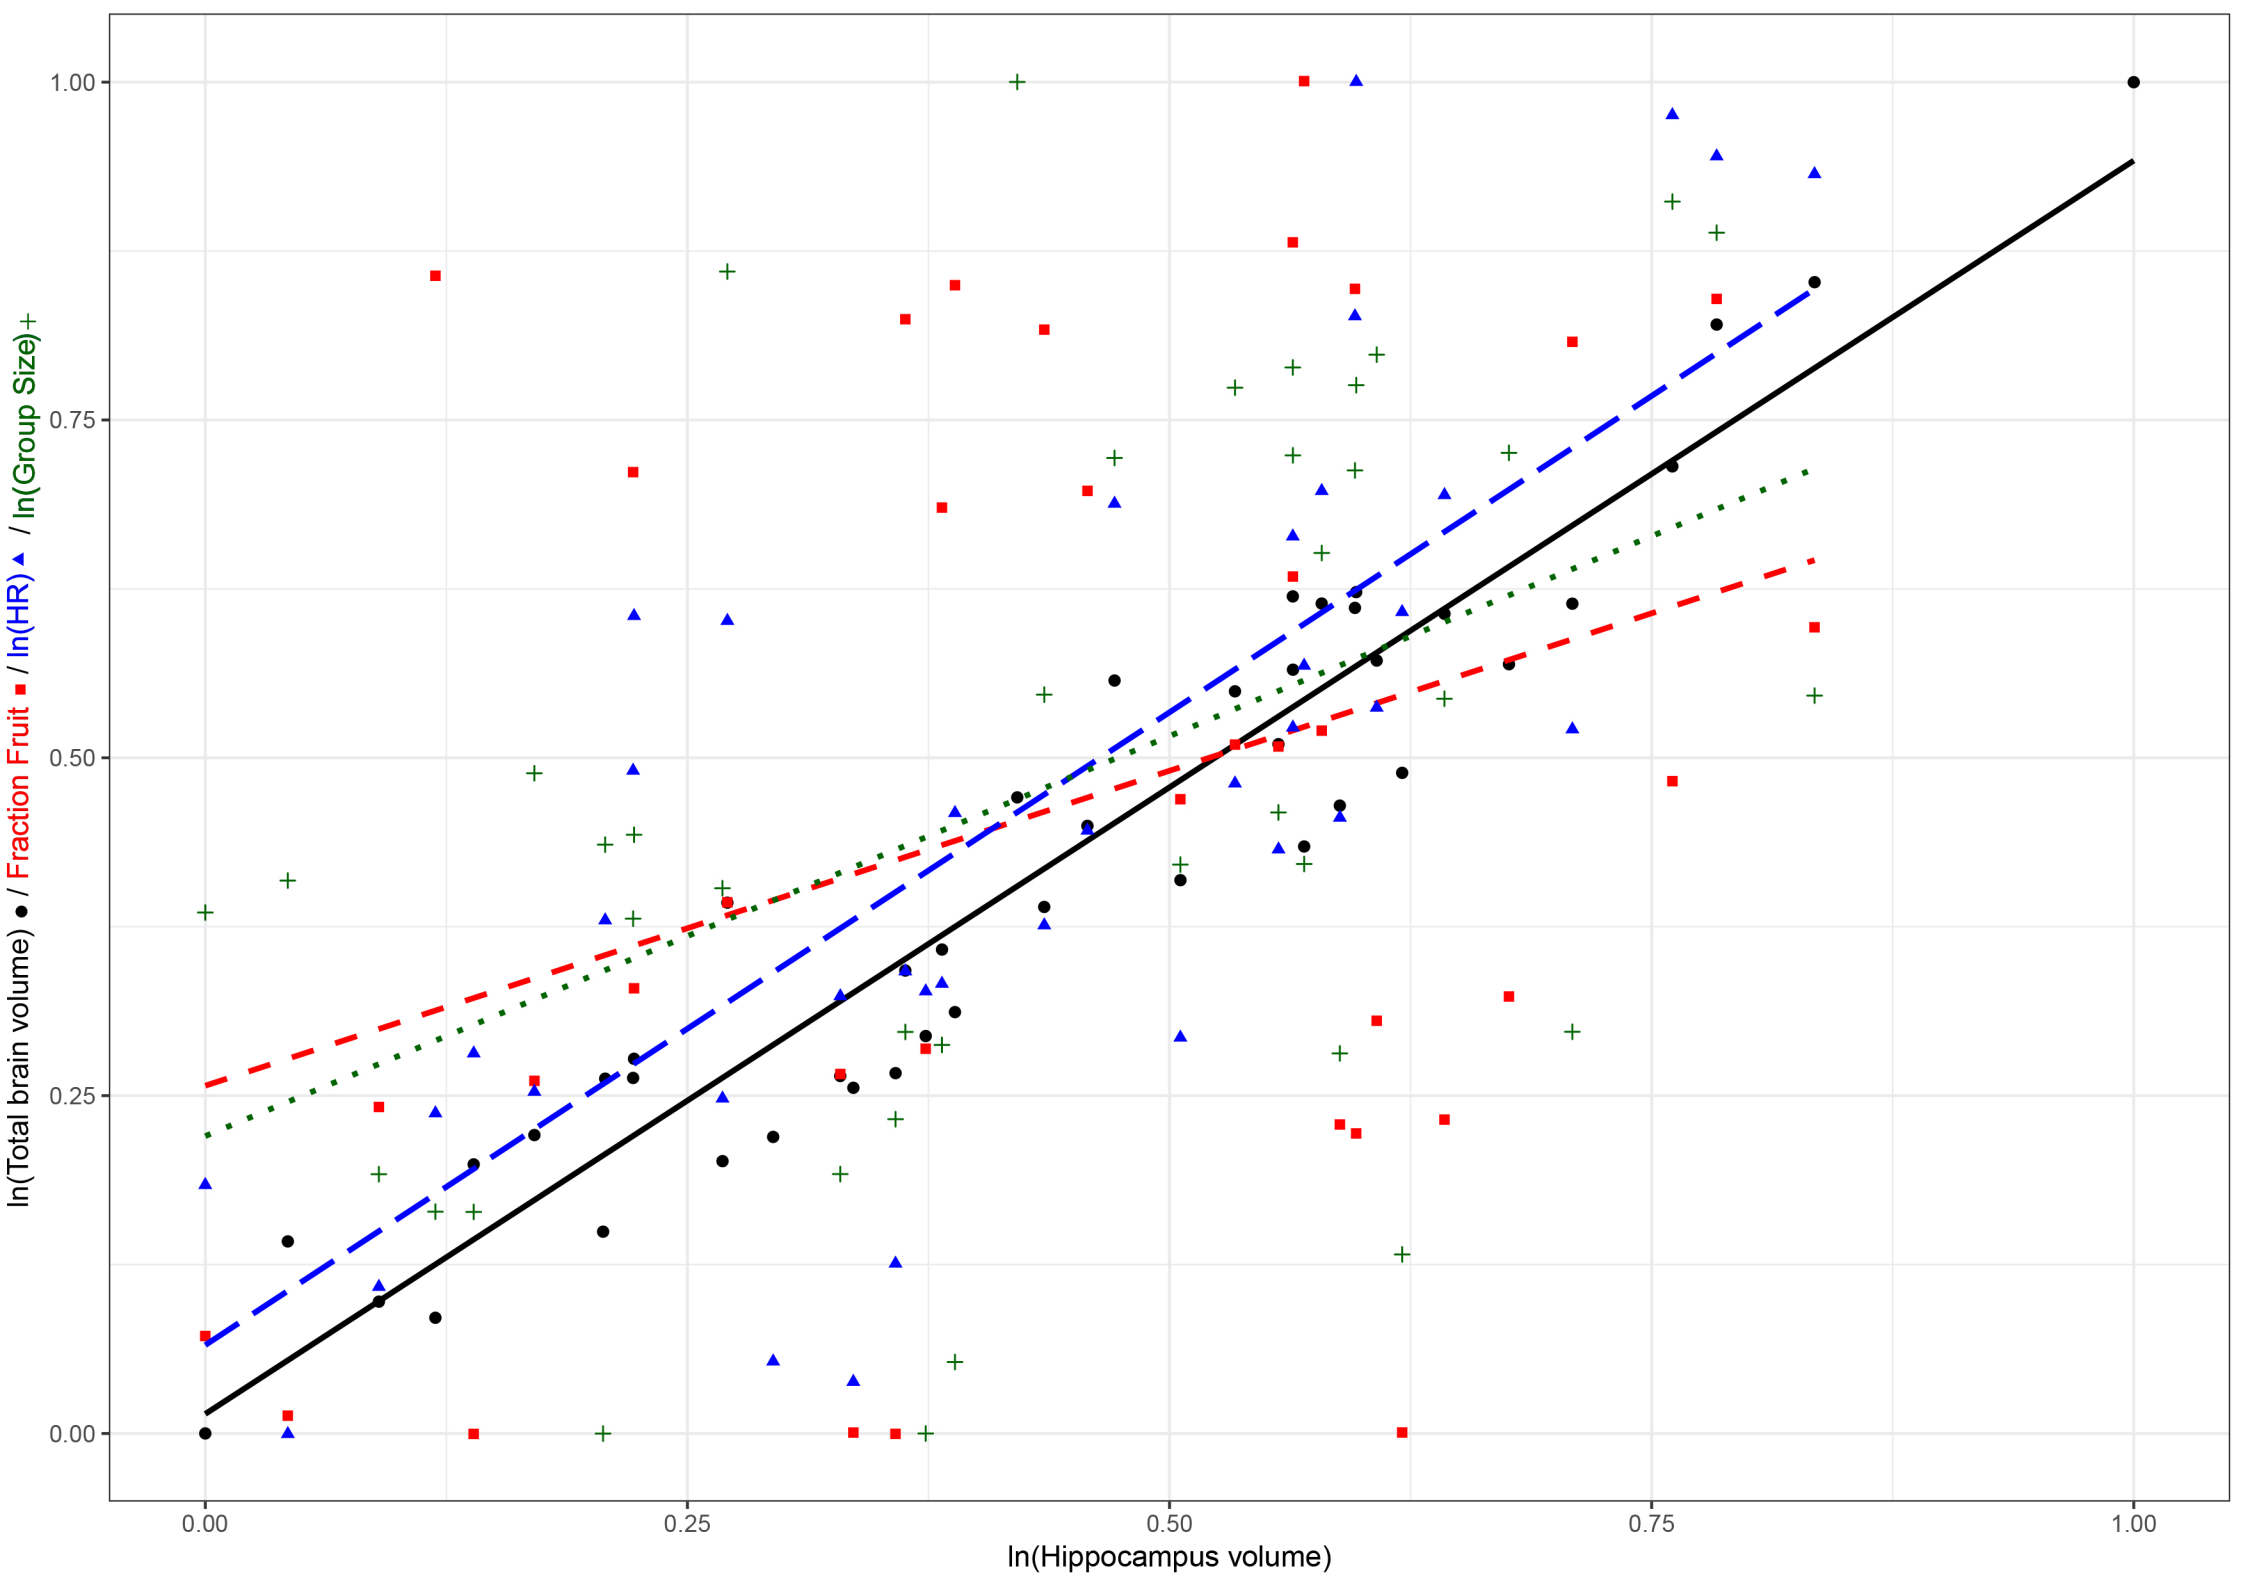

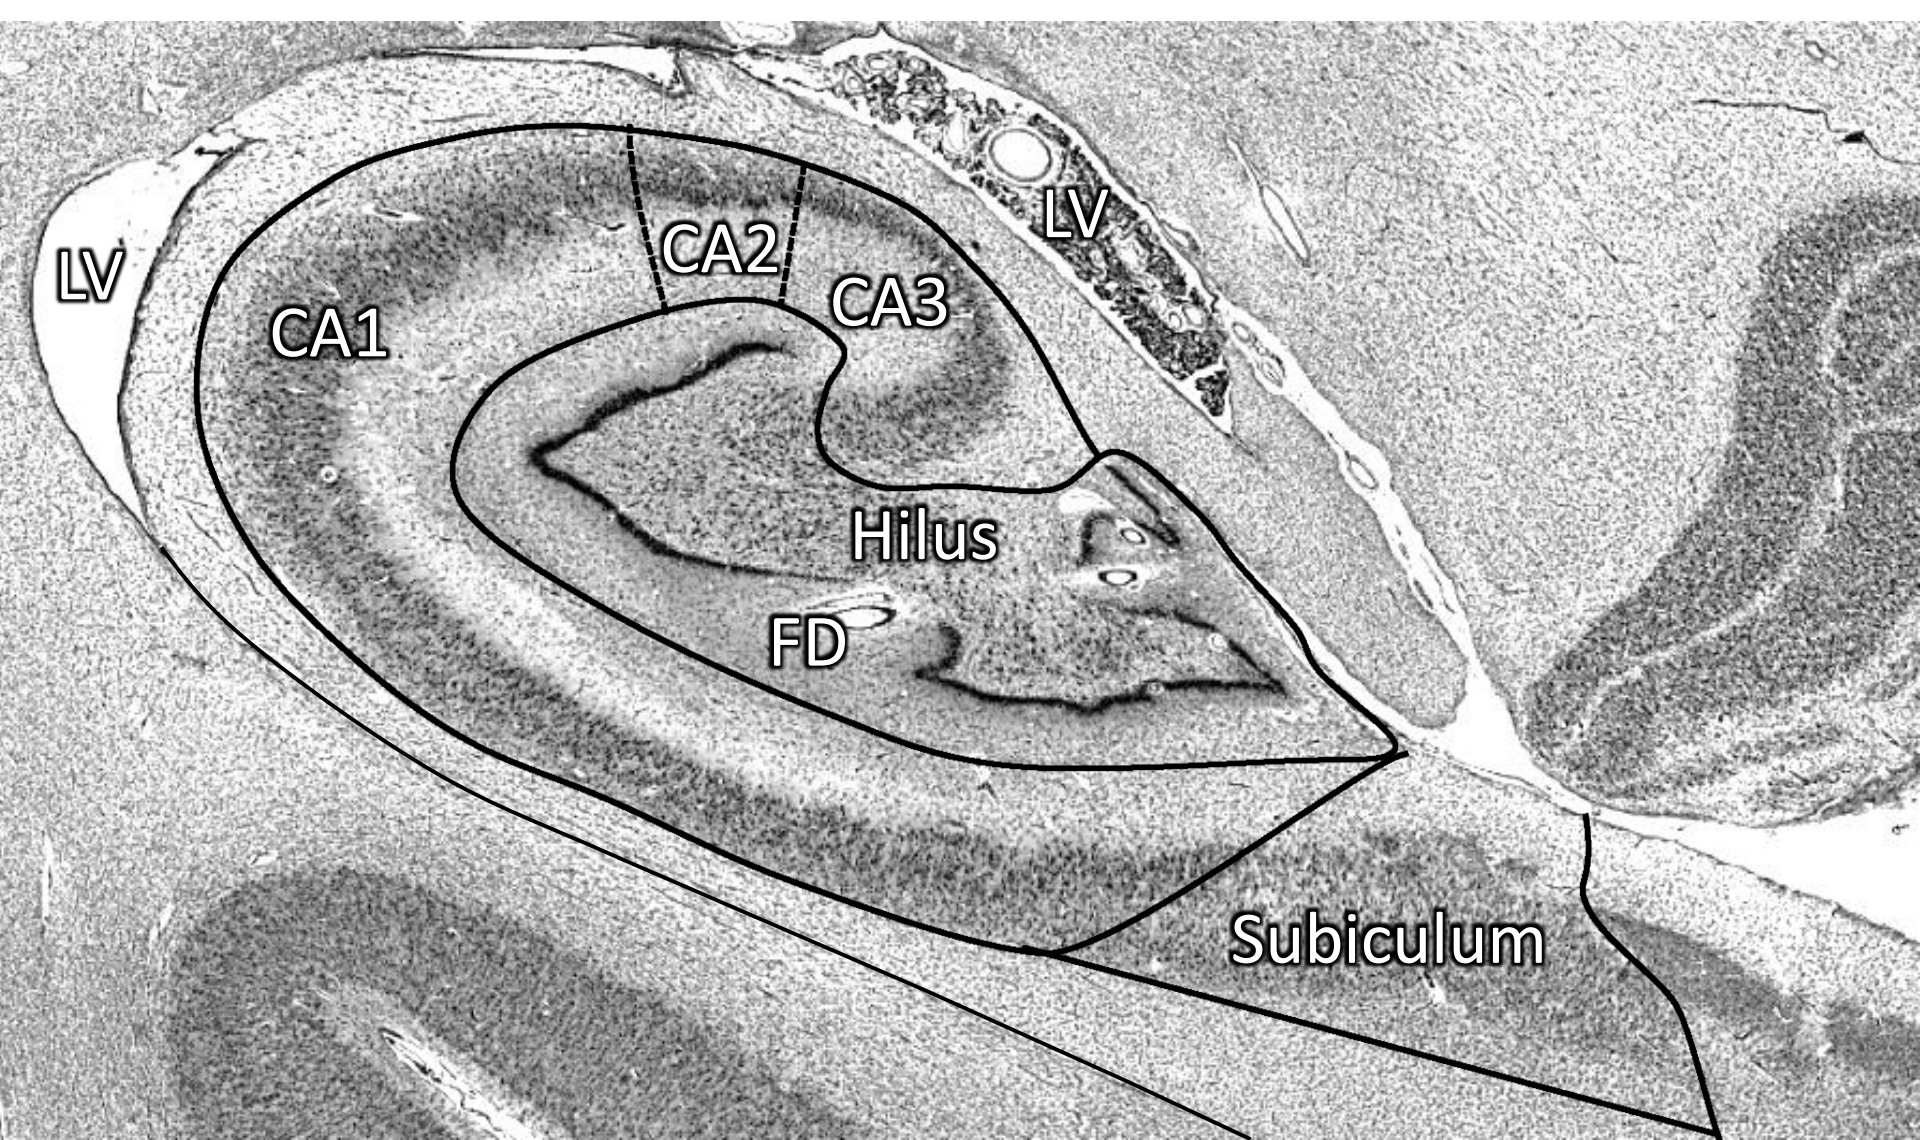



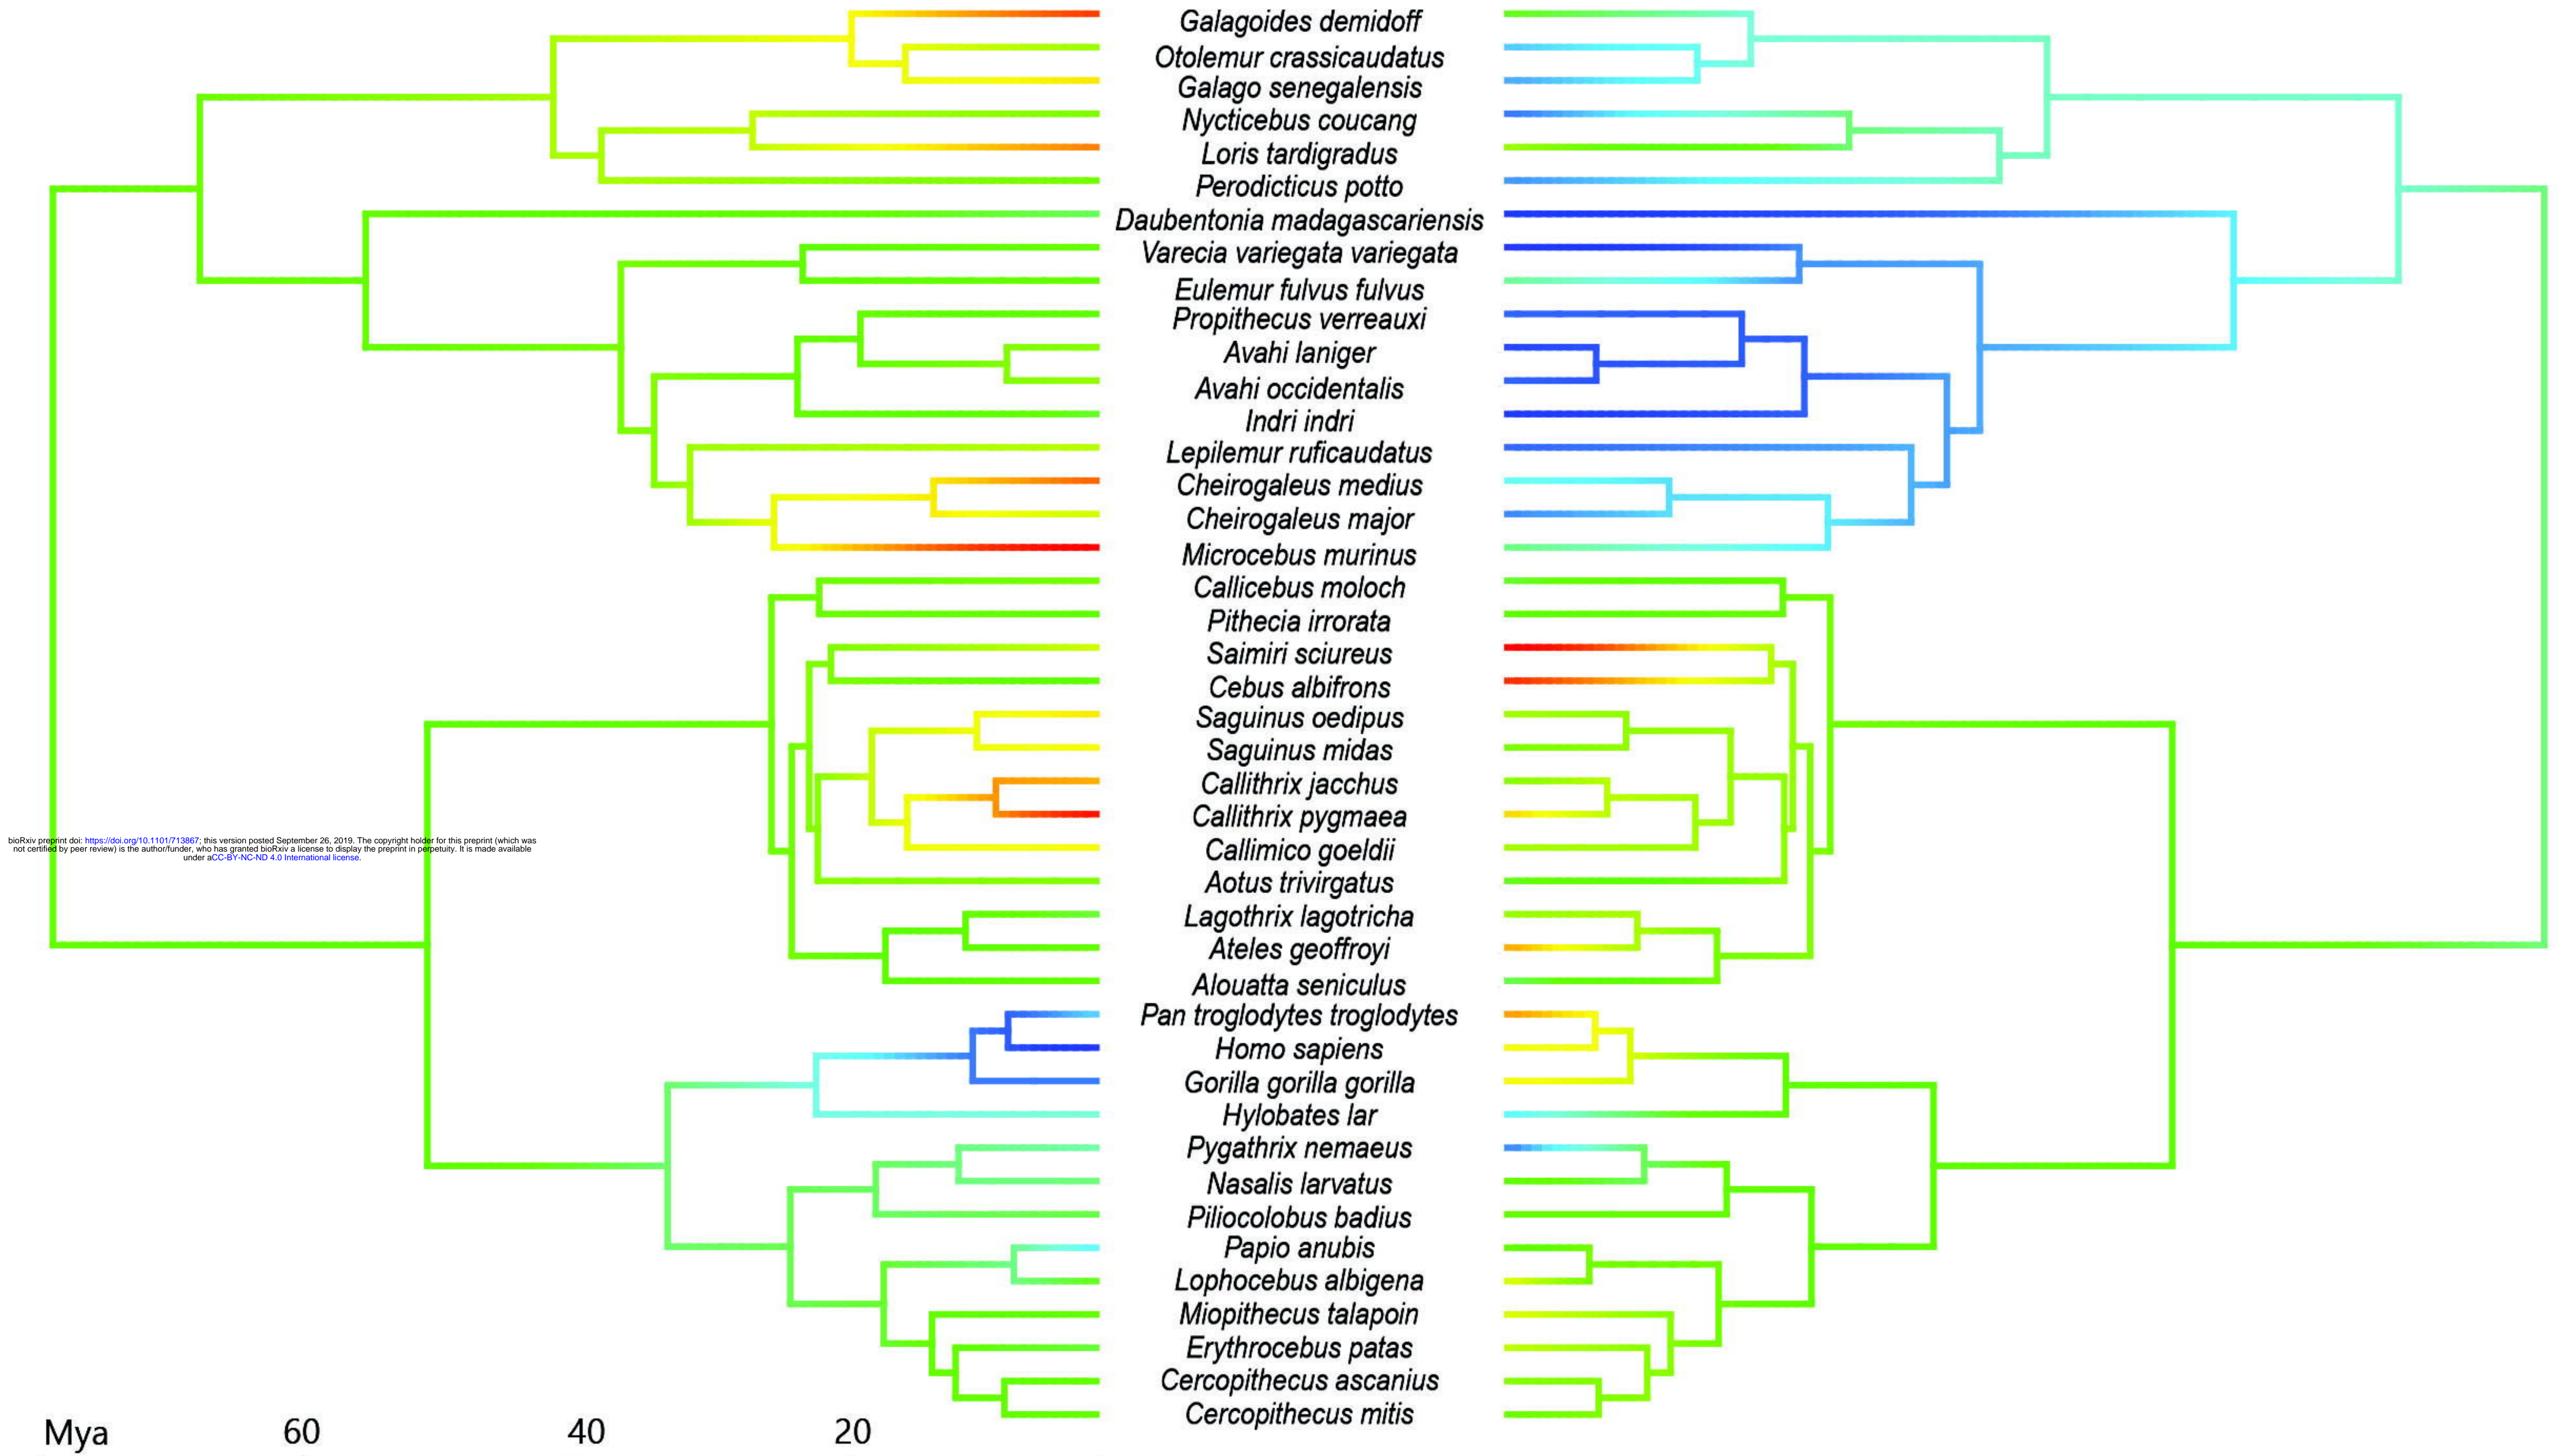

Total hippocampus volume

Relative hippocampus volume

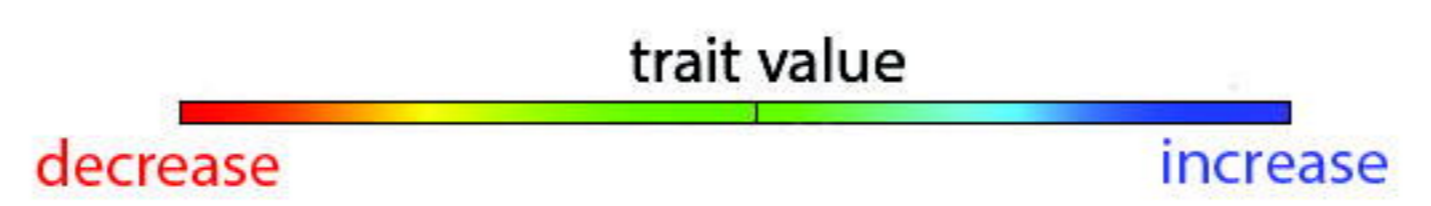

Source: https://www.biorxiv.org/content/biorxiv/early/2019/09/26/713867.full.pdf
